# Supplementary material for: Maternal bonding problems relate to aberrant neural processing of infant emotions during the first year postpartum: Results of an adapted fMRI Emotional GoNoGo Task
Source: Research Square preprint supplement (doi:10.21203/rs.3.rs-7505605/v1), 2025-09-11
Supplement: Supplementary file 1 [file 13eccae2a6f9bdd56807dbf2.docx]

**Supplemental methods**

Maternal bonding problems relate to aberrant neural processing of infant emotions during the first year postpartum: Results of an adapted fMRI Emotional GoNoGo Task

Monika Eckstein, Marlene Krauch, Ines Brenner, Beate Ditzen, Anna-Lena Zietlow

**fMRI task: Infant Emotional GoNoGo Task**

Using a specifically adapted GoNoGo paradigm, participants were presented with positive, negative and neutral expressions of pictures of unknown babies, aged approx. 4-10 months, and, unknown adults with positive, negative and neutral expressions, as well as non-social control stimuli (geometric figures; a circle, a cross, a diamond and a triangle) over six presentation blocks. Facial stimuli were taken from an established database (57) with positive, neutral and negative affect in infants with age 3-5 months and the Karolinska faces for adults, see Figure 2.

The following factors were systematically manipulated: child versus adult and emotionality of facial expression (positive vs negative vs. neutral). In two blocks, the participants received instructions to respond by pressing a button as fast as possible (Go trials) to all facial expressions except (NoGo trials) the negative (one block babies, one block adults). In two other blocks, they were instructed to respond as fast as possible to all except the positive stimuli (one block babies, one block adults). In the two non-social blocks, the participants were instructed to react as fast as possible to all shapes but not to a circle or a diamond.

Each block consisted of 12 pictures shown twice for 500ms, therefore 24 trials, of which 8 were NoGo trials. Fixation cross between trials was jittered from 1500-2000ms. Between blocks was an interval of 5000ms. Total task duration was approx. 14 minutes.

**fMRI data acquisition**

Imaging was performed using a 3Tesla Prisma-Fit Siemens Scanner (Siemens, Erlangen, Germany) at the Department of Neuroradiology at University Hospital Heidelberg. First a detailed anatomical scan was obtained with a magnetization prepared rapid gradient echo (MPRAGE) sequence with repetition time TR=1.9s, echo time TE=2.52ms, flip angle=9° and an isotropic resolution of 1x1x1mm, followed by functional scans. Functional images were acquired with an Echo Planar Imaging (EPI) sequence with TR=1.64s, TE=30ms, flip angle=73° and GRAPPA factor 2 in 30 slices of 3mm thickness, and field of view FoV=192mm for a voxel size of 3x3x3mm.

**Analyses**

Behavioral data were analyzed using IBM SPSS statistics 29.0 using t-tests for independent groups (BP vs. CG) with a two-tailed p<.05. We additionally performed one-way analyses of variance with depressiveness (EPDS) as a covariate (ANCOVAs) to control for depression effects on group differences.

For fMRI data, using SPM12 (Wellcome Center for Human Neuroimaging, London, UK) we first conducted preprocessing of the functional data with the following steps: Slice time correction, realignment to the first image. Anatomical images were segmented and normalized to the SPM 12 NMI template. Functional images were coregistered with these anatomical images and normalized in NMI space rescaling to voxel size 2x2x2mm. After smoothing with a full width at half maximum FWHM=8x8x8mm Gaussian kernel, additional normalization to NMI space with rescaling to 1x1x1mm was done. The first 5 images of each session were discarded.

On the first level, we specified an event-related model with 3 sessions and for each the 12 task conditions as saved in the logfiles with the onsets of symbols, adult positive faces, adult negative faces, baby positive faces and baby negative faces, both as Go and NoGo conditions, and neutral adult and neutral baby faces as Go condition. Interstimulus intervals entered the implicit baseline. We controlled for the movement regressors obtained from preprocessing and applied a high pass filter of 128 and convolved the conditions with the canonical hemodynamic response function. The estimated model calculated contrasts for the relevant conditions such as T1[emotional baby face > neutral baby face] and Mean [[baby face NoGo > baby face Go] > [adult face NoGo > adult face Go]]. On the second level, participant-specific contrast maps from the first level analyses were compared between patients and controls with two-sample t-tests and EPDS scores were tested as covariates. A significance threshold of p=0.05 cluster-level FWE-corrected with cluster-defining height threshold of p=0.001 uncorrected was applied. Probabilistic labelling of regions for the tables was done using SPM built-in Neuromorphometrics atlas.
